# Supplementary material for: Imaging NRF2 activation in non-small cell lung cancer with positron emission tomography
Source: Springer Nature journal article supplement (doi:10.1038/s41467-024-54852-4), 2024-12-17
Supplement: MOESM1 [file 41467_2024_54852_MOESM1_ESM.pdf]

# Supplementary Information: Imaging NRF2 activation in non-small cell lung cancer with positron emission tomography

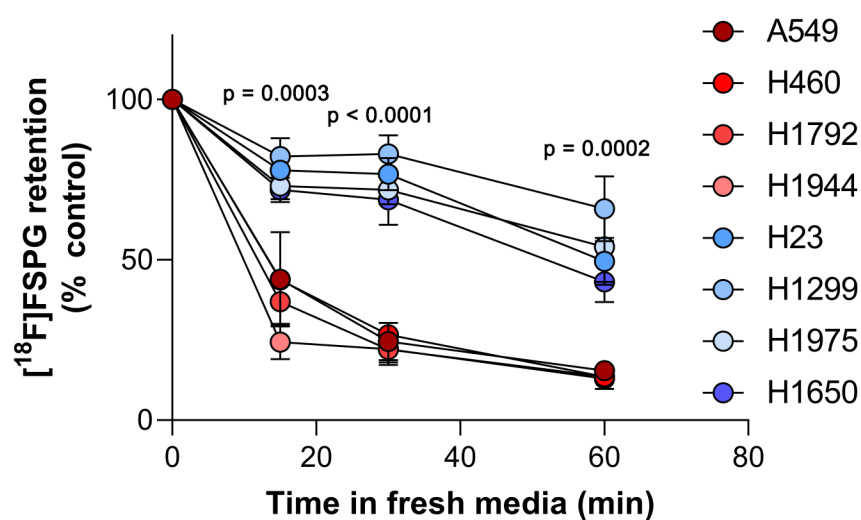

**Supplementary Figure 1.** Time course of [ $^{18}\text{F}$ ]FSPG efflux across NRF2-high (red) and NRF2-low NSCLC cells (blue). Data are presented as mean  $\pm$  SD from  $n = 3$  independent experiments. Comparisons between groups (NRF2-high vs. NRF2-low cells) for each time point were made using an unpaired two-tailed Student's t-test. Source data are provided as a Source Data file.

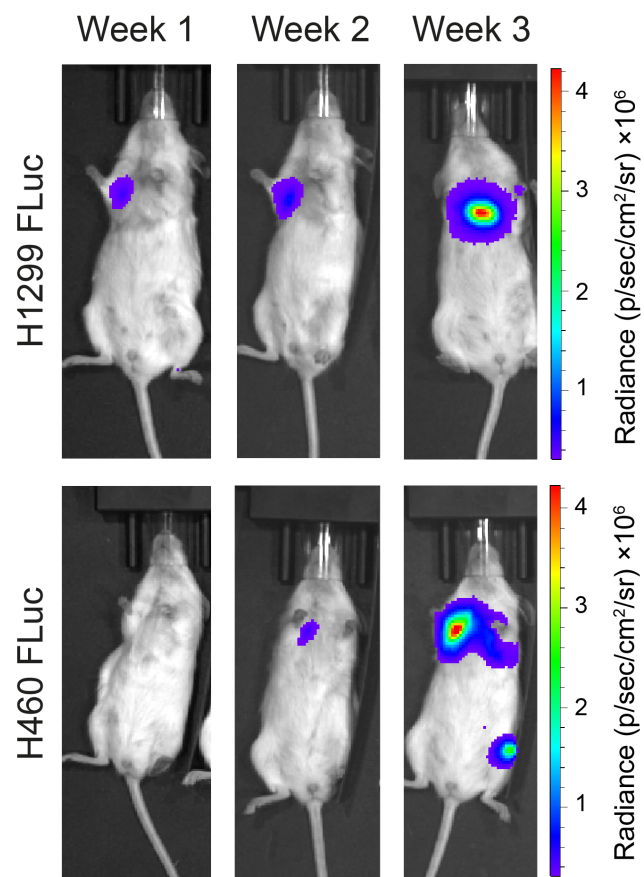

**Supplementary Figure 2.** Representative BLI from mice orthotopically implanted with H460 FLuc and H1299 FLuc tumour cells.

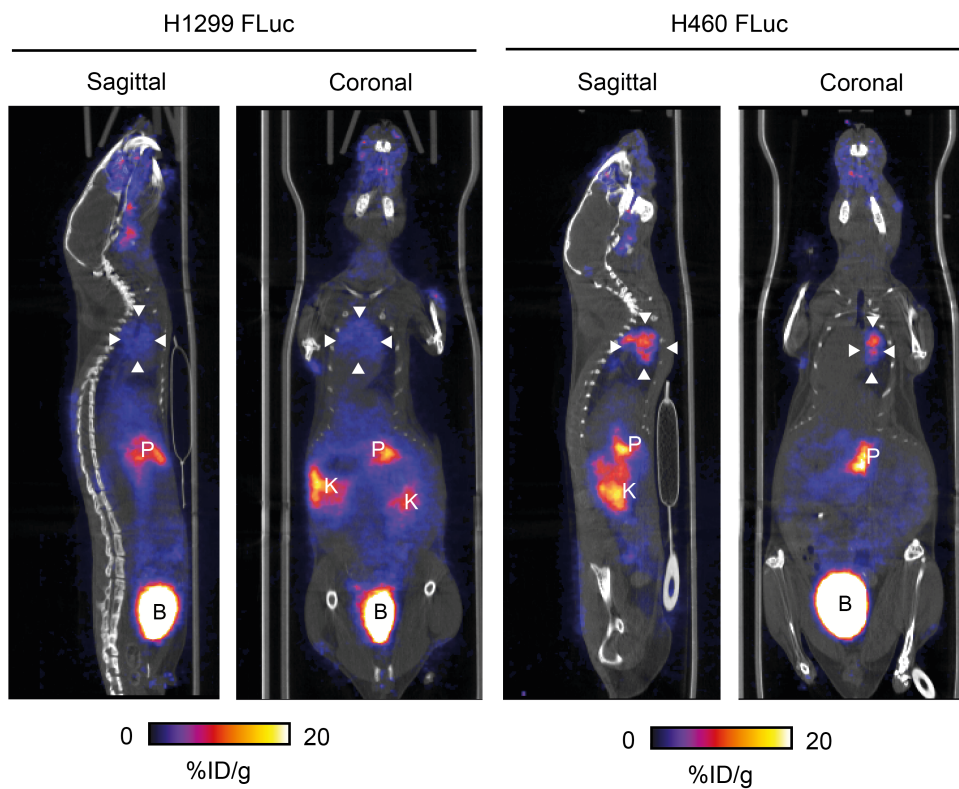

**Supplementary Figure 3.** Representative single slice PET/CT images from mice orthotopically implanted with H460 FLuc and H1299 FLuc tumour cells. Arrowheads denote the tumour. K, kidney; P, pancreas; B, bladder.

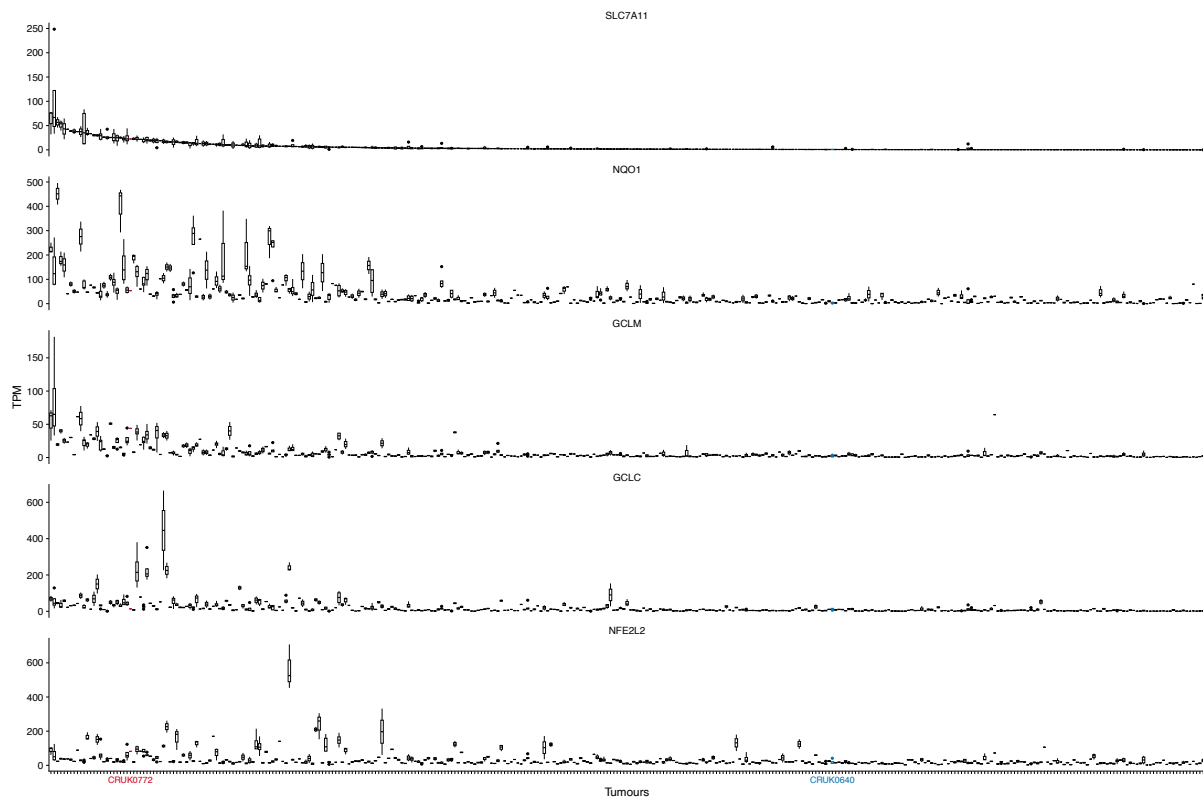

**Supplementary Figure 4.** Multi-region bulk RNA sequencing data from 882 samples from 349 NSCLC tumours from 344 patients. Plots show expression (transcripts per million) of *SLC7A11*, *NQO1*, *GCLM*, *GCLC* and *NFE2L2*. Box plots show the lower and upper quartiles (box limits) and the median (centre line). The length of whiskers is  $1.5 \times$  interquartile range and outlier points outside this range are shown. Tumours are ordered by *SLC7A11* expression. CRUK0772 (red) and CRUK0640 (blue) are indicated.

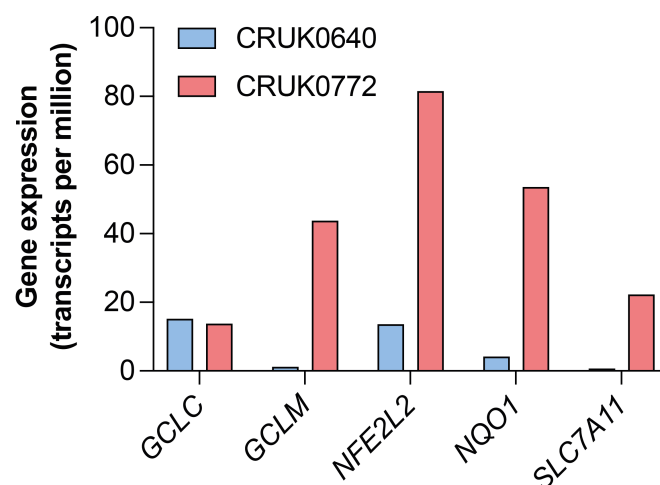

**Supplementary Figure 5.** NRF2-regulated gene expression in CRUK0640 and CRUK0772 tumour resection samples from TRACERx421 RNA sequencing data. Data are from two individual patients. Source data are provided as a Source Data file.



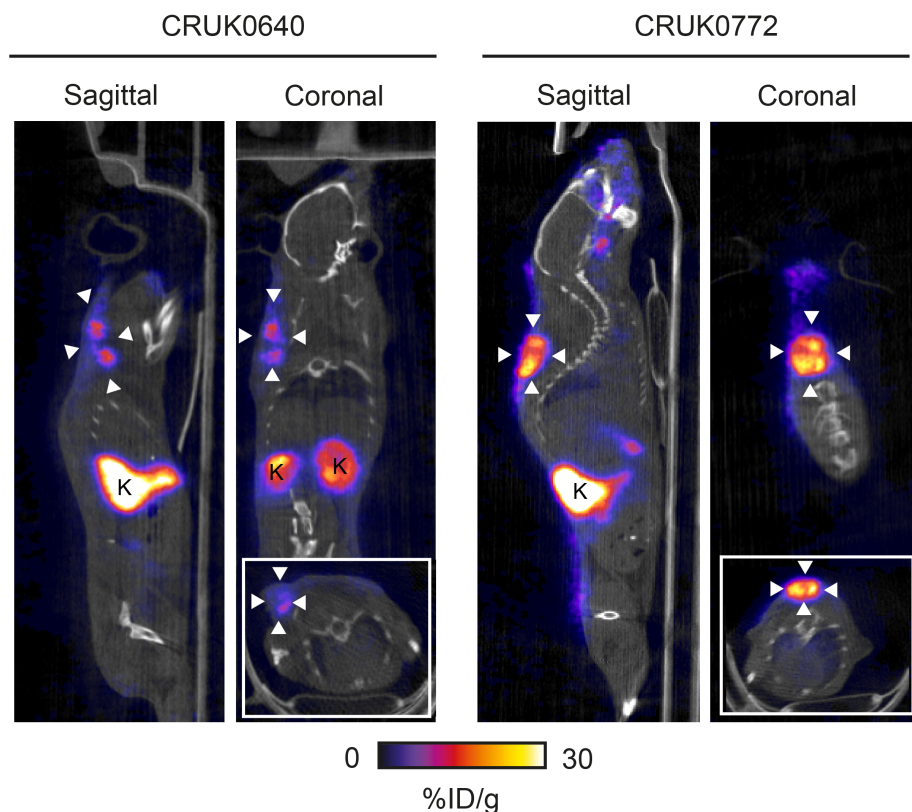

**Supplementary Figure 6.** Representative single slice PET/CT images from mice bearing CRUK0640 or CRUK0772 patient-derived xenografts. The axial view is shown as an insert. Arrowheads denote the tumour. K, kidney.

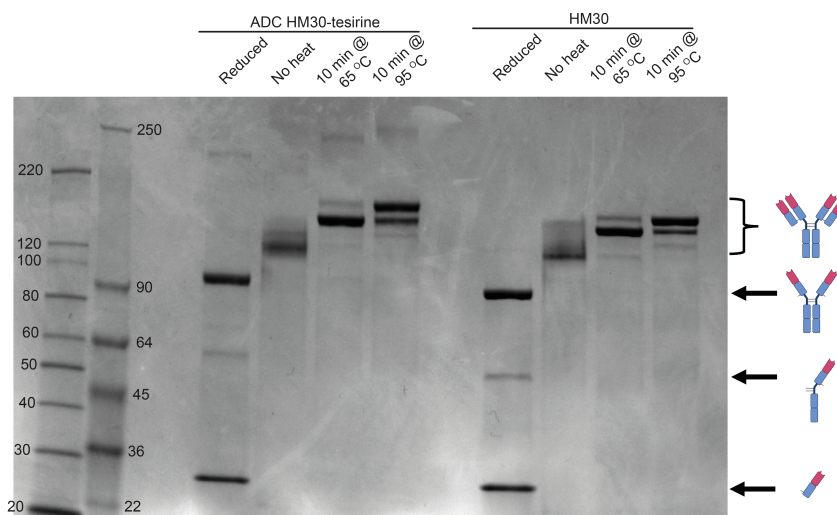

**Supplementary Figure 7.** HM30-tesirine and unconjugated HM30 monoclonal antibody SDS-PAGE profile with a range of pre-treatment conditions. Antibody schematics created with BioRender.com released under a Creative Commons Attribution-NonCommercial-NoDerivs 4.0 International license, <https://creativecommons.org/licenses/by-nc-nd/4.0/deed.en>

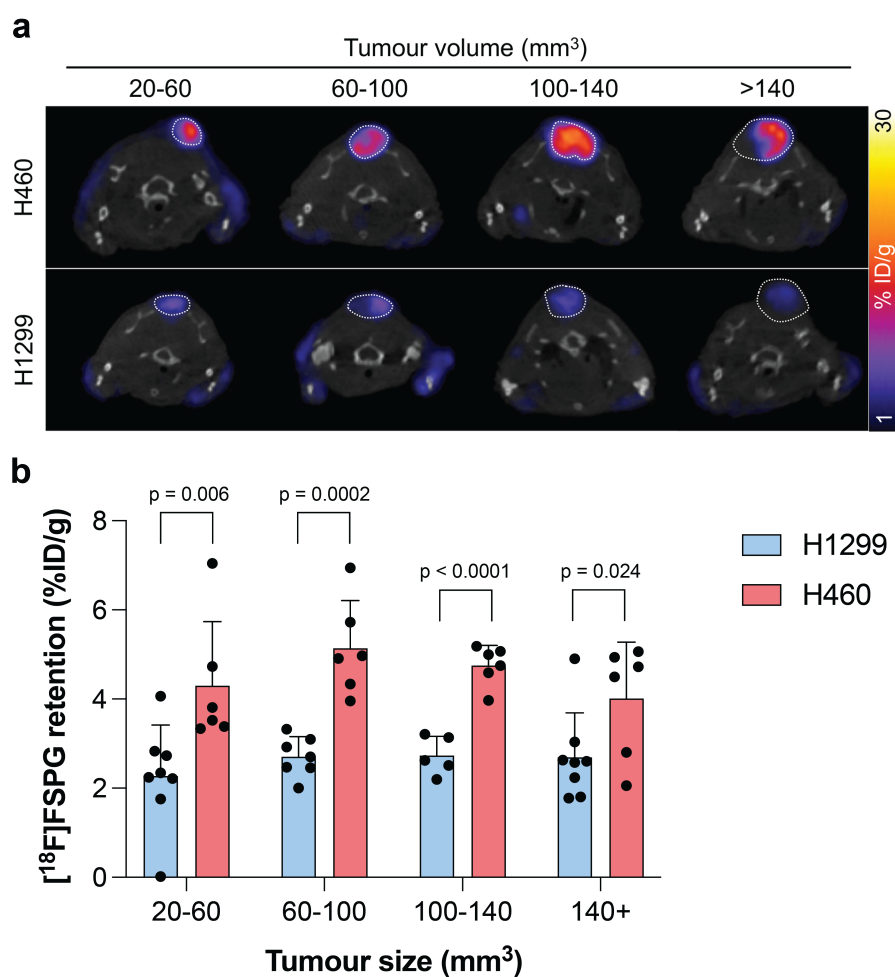

**Supplementary Figure 8.** [ $^{18}\text{F}$ ]FSPG can distinguish NRF2-high from NRF2-low-expressing tumours across a range of tumour volumes. **a** Representative axial [ $^{18}\text{F}$ ]FSPG PET/CT images of 40-60 min summed activity in mice bearing subcutaneous H460 (NRF2-high) and H1299 (NRF2-low) tumours of varying size. Dashed white lines indicate the tumour. **b** Quantification of [ $^{18}\text{F}$ ]FSPG tumour retention. Data are presented as mean  $\pm$  SD from  $n = 5-8$  mice. Comparisons were made using an unpaired two-tailed Student's  $t$ -test. For (**b**) source data are provided as a Source Data file.

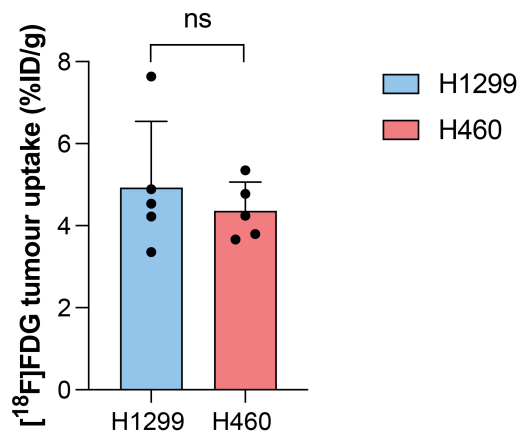

**Supplementary Figure 9.** [<sup>18</sup>F]FDG cannot distinguish NRF2-high from NRF2-low-expressing tumours. Quantification of [<sup>18</sup>F]FDG tumour retention in mice bearing H460 (NRF2-high) and H1299 (NRF2-low) subcutaneous tumours. ns, not significant. Data are presented as mean  $\pm$  SD from n = 5 mice. Comparisons were made using an unpaired two-tailed Student's t-test. Source data are provided as a Source Data file.

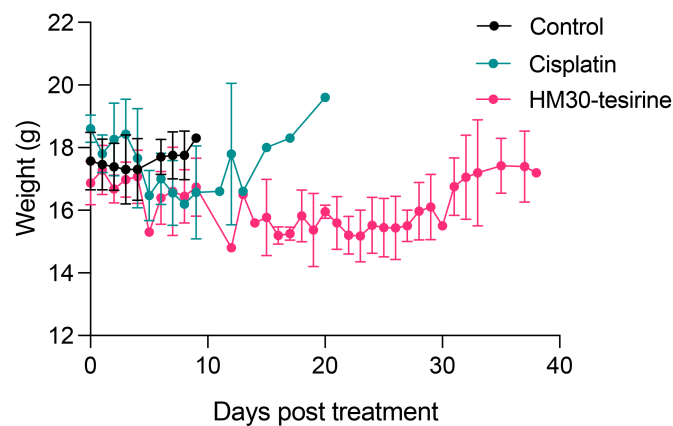

**Supplementary Figure 10.** Body weight from H460 tumour-bearing mice following treatment with vehicle control, cisplatin, and HM30-tesirine. Data are presented as mean  $\pm$  SD from n = 5-6 mice. Source data are provided as a Source Data file.

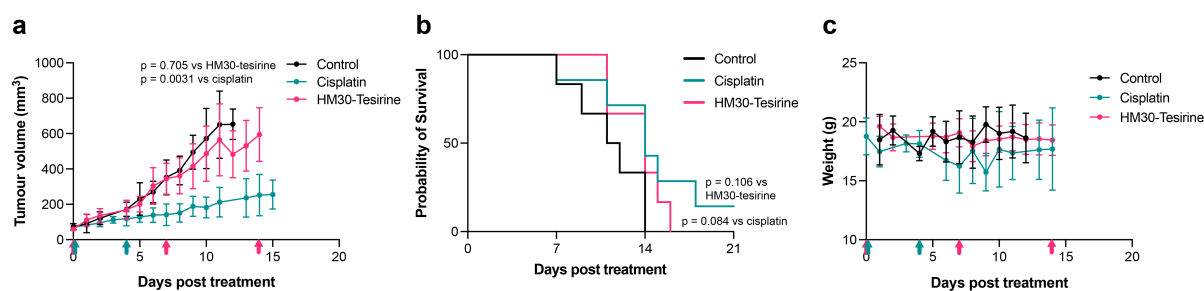

**Supplementary Figure 11.** HM30-Tesirine has no efficacy in NRF2-low H1299 tumours. Anti-tumour activity (**a**), survival benefit (**b**) and animal weights (**c**) of control (saline treated), cisplatin treated, and HM30-Tesirine treated mice. For (**a**, **c**) data are presented as mean  $\pm$  SD from  $n = 6-7$  mice. The arrows under the x-axis of (**a**, **c**) represent treatment cycles for cisplatin (green) and HM30-Tesirine (red). For (**a**) comparisons were made on day 11 using a one-way ANOVA with followed by t-tests multiple comparison correction (Tukey method). For (**b**), statistics were analysed with a log-rank (Mantel–Cox) test. To control the family-wise error rate in multiple comparisons, crude  $p$  values were adjusted by the Holm–Bonferroni method. Source data are provided as a Source Data file.
